# Supplementary material
Source: publisher figshare collection journal article supplement (https://wiley.figshare.com/articles/dataset/_/3550476)
Supplement: Supplementary file 1 [file 1 › appendix-A.htm]

Ecological Archives E092-008-A1


### *Ecological Archives* E092-008-A1

### **Eelke Jongejans, Katriona Shea, Olav Skarpaas, Dave Kelly, and Stephen P. Ellner. 2011. Importance of individual and environmental variation for invasive species spread: a spatial integral projection model. *Ecology* 92:86–97.**

Appendix A. Mathematical details of spatial integral projection models.

> View / download PDF.

---


[Back to E092-008]
